# Supplementary material for: Infectivity and stress tolerance traits underlie phenotypic clustering in communities of plant pathogenic fungi
Source: Research Square preprint supplement (doi:10.21203/rs.3.rs-2672268/v1), 2023-03-23
Supplement: Supplementary file 1 [file 46c124b2739fe949b38d10d2.xlsx]

## Sheet: Infectivity ratio
Ratio	SY32_C14T	SY22_C18T	SY16_G26A	SY147_A71G	SY144_C172T	SY175_A203C	SY6_G283A	SY98_C545A
Inoculum-average	0.0140382	0.335591	0.00271865	0.410572	0.0185617	0.190064	0.209161	0.00597108
Inoculum	0.00510856	0.344578	0	0.409938	0.0200364	0.181034	0.209598	0.00499168
Inoculum	0.00395257	0.351648	0.00904977	0.429767	0.0239006	0.186354	0.209278	0.00695048
Inoculum	0.0140127	0.319071	0	0.407472	0.0128465	0.190346	0.202335
Inoculum	0.0330789	0.327068	0.00182482	0.395112	0.0174632	0.202522	0.215434
Day 7	0	0.629005	0.00211864	0.466616	0.0102881	0.0288568	0.04
Day 7	0.0133452	0.580311	0.0286436	0.472741	0.0587103	0.0222222	0.089252	0.00927152
Day 7	0.00120337	0.00459242	0.0160256	0.898354	0.0538618	0.0231823	0.0972569	0.00117509
Day 7	0	0.0307125	0.021875	0.891156	0.0149254	0.0194625	0.126731	0.0148912
Day 7	0.0133452	0.635545	0.0715768	0.374753	0.00284414	0.0290155	0.083045	0.00442968
Day 7	0.00981354	0.0247748	0.066886	0.787944	0.0110906	0.0117647	0.181633	0.00105932
Day 7	0.0149673	0.0146932	0	0.860412	0.00107181	0.0336581	0.154748
Day 14	0.046798	0.379932	0.0120482	0.132184	0.00619835	0.0376283	0.357097
Day 14		0.368421	0.00847458	0.123016	0.0495951	0.060733	0.37429	0.00372671
Day 14	0.0547148	0.190024	0	0.836232	0.0259336	0.0282167	0.991108	0
Day 14	0.0155039	0.211031	0.0338219	0.855491	0.0202634	0.0622986	0.995305	0.00798176
Day 14	0.0471513	0.441355	0.0587571	0.057047	0	0.010979	0.566363
Day 14	0.0255319	0.222731	0.0238394	0.773746	0	0.0336763	0.511603
Day 14	0.019263	0.246314	0.0523187	0.766631	0.0169677	0.040493	0.0273523	0.00361011
Day 14	0.0581694	0.461665	0.037296	0.0725552	0.00604396	0.0404676	0.004662

## Sheet: Stress ratio
Ratio	SY32_C14T	SY22_C18T	SY16_G26A	SY147_A71G	SY144_C172T	SY175_A203C	SY6_G283A	SY98_C545A
Inoculum	0.0140382	0.335591	0.00271865	0.417227	0.0185617	0.190064	0.209161	0.00597108
1_CM	0.0124378	0.0920097	0.00881489	0.429236	0.0101146	0.251902	0.24053	0.0069808
1_CM	0.00141443	0.119363	0.0184332	0.493321	0.0157933	0.282844	0.246512	0.00964912
1_CM	0.00774194	0.110036	0.00688299	0.487468	0.0249288	0.243959	0.281599
1_CM	0.00753769	0.10728	0.0126013	0.523457	0.014862	0.269113	0.278571
2_H2O2	0.00991326	0.203163	0.000957854	0.751416	0.0147929	0.0241287	0.0843373	0.00419727
2_H2O2	0.0171149	0.219108	0.0104364	0.796426	0.0284553	0.0100733	0.0863539	0.0141398
2_H2O2	0.0151899	0.34466	0.00757576	0.687827	0.0175268	0.017658	0.0942797	0.0141458
2_H2O2	0.0127714	0.357233	0.00635786	0.694805	0.0175268	0.0220386	0.0943613	0.00963082
3_Sorbitol	0.0171731	0.0763636	0	0.171277	0.0435556	0.0599078	0.798419	0.00981461
3_Sorbitol	0.0206186	0.0539811	0.0137457	0.145374	0.0486177	0.0909871	0.812232	0.0104586
3_Sorbitol	0.0233702	0.0586797	0.0168955	0.177202	0.0211538	0.0769231	0.747573	0.0201568
3_Sorbitol	0.0123762	0.0544304	0.0160367	0.193016	0.0146771	0.08646	0.752759	0.00574713
4_NaCl	0.00388601	0.207143	0	0.520958	0.0205357	0.0819082	0.340364	0.00652529
4_NaCl	0.0271669	0.208895	0.0132275	0.580237	0.0146924	0.0910698	0.297076	0.00568643
4_NaCl	0.0134639	0.265455	0.00823422	0.602729	0.0278607	0.0658135	0.249754
4_NaCl	0.014742	0.270807	0.0121739	0.592204	0.0196445	0.0954428	0.233721
5_SDS	0.00421348	0.125954	0	0.0792193	0.0401662	0.860132	0.0989011	0.00945017
5_SDS	0	0.122108	0.0220653	0.0876232	0.0264123	0.884615	0.115956	0.00765306
5_SDS	0.0376623	0.066242	0.000961538	0.0929451	0.00886525	0.913103	0.0912659
5_SDS	0.0369881	0.117284	0	0.0528256	0.0125604	0.925081	0.0779363
6_Fludioxonil	0.0383189	0.190821	0.00585938	0.376694	0.0187688	0.32046	0.199134	0.0145051
6_Fludioxonil	0.021767	0.169884	0.0110906	0.401224	0.0409189	0.30609	0.214801	0.00588235
6_Fludioxonil	0.00535475	0.0709046	0.0136187	0.357708	0.0446497	0.75398	0.140667
6_Fludioxonil	0.0226969	0.065189	0.00465983	0.367906	0.0279617	0.780959	0.141232
7_Iprodione	0.0207792	0.23522	0.00479846	0.483135	0.0356212	0.177988	0.234995	0.0059676
7_Iprodione	0.00132979	0.230028	0.0193492	0.525103	0.0311909	0.162449	0.257905	0.0129345
7_Iprodione	0.00865266	0.420307	0.000908265	0.216106	0.0350047	0.161922	0.294957
7_Iprodione	0.00247831	0.422414	0.00508906	0.239726	0.0148976	0.168103	0.288747
8_Tebuconazole	0	0.00512821	0.00103734	0.0554913	0.0126019	0.317797	0.643519	0.00684932
8_Tebuconazole	0.015852	0.0116129	0.0241287	0.0126002	0.0612833	0.342314	0.621226	0.0143312
8_Tebuconazole	0.00516129	0.0197775	0	0.0487541	0.0167273	0.327126	0.621154
8_Tebuconazole	0.00384123	0.0250313	0.0119284	0.0389064	0.026334	0.374242	0.601254
9_Tunicamycin	0.011583	0.0741656	0.00473934	0.205853	0.0295775	0.743725	0.183579	0.00703606
9_Tunicamycin	0	0.0729167	0.00188501	0.200676	0.0127246	0.750336	0.182994	0.0117754
9_Tunicamycin	0.00391645	0.0943627	0.0252427	0.372819	0.0399429	0.449757	0.18647
9_Tunicamycin	0.00259403	0.0916031	0.00829493	0.449183	0.0167015	0.624362	0.195122
10_DTT	0.0146699	0.388889	0.00642792	0.0314254	0.0375114	0.154639	0.472249	0.00929054
10_DTT	0.00529101	0.386305	0.00628931	0.0483314	0.0243665	0.144953	0.468909	0.0048583
10_DTT	0.00767263	0.27284	0.0160529	0.0350493	0.0391221	0.126307	0.581594
10_DTT	0.0325815	0.300752	0.0130662	0.0138365	0.0304762	0.123524	0.583772
11_pH2	0.00262123	0.16646	0	0.0774411	0.00899654	0.872555	0.0267062	0.015953
11_pH2	0.0273438	0.157895	0.0112749	0.0791527	0.0110701	0.877183	0.0224972	0.00598291
11_pH2	0.00714286	0.269185	0.00955414	0.0619381	0.03125	0.769379	0.0473037
11_pH2	0.0104849	0.277849	0.014978	0.0651429	0.0282528	0.76496	0.0486381
12_pH12	0.0075662	0.518561	0	0.0253583	0.0331651	0.336187	0.11824	0.0059727
12_pH12	0.0331695	0.528822	0.0102516	0.0367075	0.0125833	0.328627	0.0993049	0.0169492
12_pH12	0.00505689	0.524814	0.0164729	0.0125285	0.0211002	0.411229	0.0803828
12_pH12	0.0173797	0.535248	0.00479846	0.0116279	0.0372453	0.424397	0.0842418

## Sheet: Relative abundance
Wheat infection	SY32	SY22	SY16	SY147	SY144	SY175	SY6	SY98	Shannon	Inverse Simpson
Inoculum	1	1	1	1	1	1	1	1	2.07944	8
Day 7	0.536033	0.817165	10.8839	1.65343	1.17594	0.126395	0.52773	1.03254	1.27022	2.24729
Day 14	2.71842	0.939191	10.4168	1.10118	0.841802	0.206833	2.28758	0.641365	1.47418	2.94915
Stress condition	SY32	SY22	SY16	SY147	SY144	SY175	SY6	SY98	Shannon	Inverse Simpson
Inoculum	1	1	1	1	1	1	1	1	2.07944	8
CM	0.518797	0.319354	4.29739	1.15853	0.884869	1.37824	1.25168	1.39254	1.80834	4.75824
H2O2	0.979283	0.83745	2.32909	1.75592	1.05461	0.0972022	0.429492	1.76324	1.87216	5.86242
Sorbitol	1.30961	0.181363	4.29237	0.411568	1.72404	0.413385	3.7184	1.93336	1.73237	4.76389
NaCl	1.05531	0.709419	3.09305	1.37583	1.1143	0.439634	1.33977	1.02257	1.93137	5.93694
SDS	1.40445	0.321513	2.11749	0.187316	1.18529	4.7128	0.459047	1.43217	1.70401	4.30262
Fludioxonil	1.5696	0.370092	3.23952	0.900907	1.78188	2.84311	0.831697	1.70718	1.91808	6.09647
Iprodione	0.591956	0.974376	2.77205	0.877262	1.57198	0.88189	1.28681	1.58281	1.97296	6.47141
Tebuconazole	0.442624	0.0458518	3.41111	0.0933257	1.57511	1.79082	2.97277	1.77359	1.71081	4.96506
Tunicamycin	0.322219	0.248105	3.6932	0.736129	1.33267	3.37805	0.894245	1.57521	1.7609	4.81413
DTT	1.07234	1.00478	3.84716	0.0770818	1.7708	0.722681	2.51782	1.18478	1.81514	5.24471
pH 2	0.847559	0.649144	3.29273	0.169976	1.07169	4.3197	0.173485	1.83684	1.67241	4.33799
pH 12	1.12501	1.56995	2.89877	0.0516638	1.402	1.9736	0.456788	1.91941	1.86465	5.93419
