# Supplementary material for: Infectivity and stress tolerance traits underlie phenotypic clustering in communities of plant pathogenic fungi
Source: Research Square preprint supplement (doi:10.21203/rs.3.rs-2672268/v1), 2023-03-23
Supplement: Supplementary file 2 [file c077802dce62fb502325379f.xlsx]

## Sheet: Strains
Strain	Stock ID	Province	City/County	Host	Phylogeny	Trichothecene chemotype	Phylogenetic group	Stress tolerant group	Pooled?
SY1	P1-17-5-1-44	GN	Jinju	Barley	F. asiaticum	NIV	M	6
SY2	P1-16-3-2-39	JB	Iksan	Barley	F. asiaticum	NIV	M	10
SY3	P1-17-4-2-48	JB	Buan	Rice	F. asiaticum	NIV	M	8
SY4	P1-16-3-2-74	JB	Gunsan	Barley	F. asiaticum	NIV	M	9
SY5	P1-17-5-1-78	GN	Hapcheon	Wheat	F. asiaticum	NIV	M	7
SY6	P1-16-3-2-64	JB	Gunsan	Barley	F. asiaticum	NIV	I	5	O
SY7	P1-17-5-2-34	GB	Daegu	Barley	F. asiaticum	NIV	M	7
SY8	P1-17-2-3-31	JN	Haenam	Rice	F. asiaticum	NIV	M	7
SY9	P1-17-4-2-37	JB	Buan	Rice	F. asiaticum	NIV	K	5
SY10	P1-17-1-4-1	GN	Uiryeong	Rice	F. asiaticum	NIV	I	8
SY11	P1-16-3-4-7	GN	Miryang	Rice	F. asiaticum	NIV	K	7
SY12	P1-17-5-2-26	GN	Miryang	Barley	F. asiaticum	NIV	K	7
SY13	P1-17-5-2-45	GB	Yeongdeok	Barley	F. asiaticum	3ADON	M	2
SY14	P1-17-4-4-40	JN	Yeongam	Barley	F. asiaticum	NIV	M	11
SY15	P1-16-3-2-65	JB	Gunsan	Barley	F. asiaticum	NIV	M	7
SY16	P1-17-5-1-25	GN	Goseong	Barley	F. asiaticum	NIV	B	11	O
SY17	P1-17-5-1-54	GN	Uiryeong	Wheat	F. asiaticum	NIV	M	2
SY20	P1-16-3-2-51	JB	Jeonju	Wheat	F. asiaticum	NIV	M	7
SY21	P1-16-3-2-63	JB	Gunsan	Barley	F. asiaticum	NIV	F	7
SY22	P1-17-5-2-21	GN	Miryang	Barley	F. asiaticum	NIV	C	7	O
SY24	P1-16-3-4-10	GN	Miryang	Rice	F. asiaticum	NIV	F	8
SY25	P1-17-5-1-67	GN	Uiryeong	Barley	F. asiaticum	NIV	M	7
SY26	P1-17-5-1-72	GN	Uiryeong	Wheat	F. graminearum	3ADON	A	2
SY27	P1-17-4-4-21	JB	Buan	Barley	F. asiaticum	NIV	M	5
SY28	P1-17-4-4-71	JN	Gangjin	Barley	F. asiaticum	NIV	M	6
SY29	P1-16-3-4-2	GN	Miryang	Rice	F. asiaticum	NIV	M	11
SY30	P1-16-3-2-50	JB	Jeonju	Wheat	F. asiaticum	NIV	I	7
SY31	P1-17-1-4-31	GN	Hapcheon	Rice	F. asiaticum	NIV	F	7
SY32	P1-17-4-4-78	JN	Boseong	Barley	F. asiaticum	NIV	E	8	O
SY33	P1-17-4-2-25	JB	Buan	Rice	F. graminearum	3ADON	A	2
SY34	P1-16-3-4-79	GN	Uiryeong	Rice	F. asiaticum	NIV	M	11
SY35	P1-17-5-2-2	GN	Hapcheon	Wheat	F. asiaticum	NIV	M	8
SY36	P1-17-5-2-43	GB	Yeongdeok	Barley	F. asiaticum	NIV	I	7
SY37	P1-17-1-4-18	GN	Hapcheon	Rice	F. asiaticum	NIV	I	2
SY38	P1-16-3-2-69	JB	Gunsan	Barley	F. asiaticum	NIV	M	7
SY40	P1-16-3-2-73	JB	Gunsan	Barley	F. asiaticum	NIV	I	7
SY41	P1-17-1-4-49	GN	Miryang	Rice	F. asiaticum	NIV	M	5
SY42	P1-17-5-2-49	GB	Yeongdeok	Barley	F. asiaticum	NIV	K	7
SY43	P1-17-5-1-48	GN	Jinju	Barley	F. asiaticum	NIV	M	7
SY44	P1-16-3-4-11	GN	Miryang	Rice	F. graminearum	NIV	A	2
SY45	P1-16-3-4-80	GN	Uiryeong	Rice	F. asiaticum	NIV	K	8
SY46	P1-17-4-2-23	JB	Buan	Rice	F. asiaticum	NIV	B	9
SY47	P1-17-4-4-1	JB	Gimje	Barley	F. asiaticum	NIV	M	12
SY48	P1-17-5-1-26	GN	Goseong	Barley	F. asiaticum	NIV	M	11
SY49	P1-17-5-1-29	GN	Goseong	Barley	F. asiaticum	NIV	M	2
SY50	P1-17-1-4-37	GN	Hapcheon	Rice	F. asiaticum	NIV	M	5
SY51	P1-17-1-4-71	GN	Miryang	Rice	F. asiaticum	NIV	M	6
SY52	P1-17-5-1-69	GN	Uiryeong	Barley	F. asiaticum	3ADON	C	8
SY53	P1-17-5-1-34	GN	Goseong	Oat	F. asiaticum	NIV	I	8
SY54	P1-17-4-2-3	JB	Gunsan	Rice	F. graminearum	15ADON	A	2
SY55	P1-17-5-1-39	GN	Jinju	Barley	F. asiaticum	3ADON	E	8
SY56	P1-17-5-1-70	GN	Uiryeong	Wheat	F. asiaticum	NIV	M	7
SY58	P1-17-5-1-14	GN	Goseong	Barley	F. asiaticum	NIV	M	7
SY59	P1-17-2-3-70	JB	Gunsan	Rice	F. asiaticum	NIV	J	8
SY60	P1-17-1-4-33	GN	Hapcheon	Rice	F. graminearum	3ADON	A	2
SY61	P1-17-4-4-50	JN	Haenam	Wheat	F. asiaticum	NIV	J	8
SY62	P1-17-5-1-22	GN	Goseong	Barley	F. asiaticum	NIV	M	7
SY63	P1-16-3-2-54	JB	Iksan	Wheat	F. asiaticum	NIV	M	8
SY64	P1-17-5-1-18	GN	Goseong	Barley	F. graminearum	15ADON	A	2
SY65	P1-16-3-2-77	JB	Gimje	Barley	F. asiaticum	NIV	M	6
SY66	P1-17-4-4-43	JN	Yeongam	Barley	F. asiaticum	NIV	M	2
SY67	P1-17-5-1-32	GN	Goseong	Wheat	F. asiaticum	NIV	I	9
SY68	P1-17-4-4-38	JB	Buan	Barley	F. asiaticum	NIV	I	12
SY69	P1-17-4-4-69	JN	Haenam	Barley	F. asiaticum	NIV	M	8
SY70	P1-17-5-2-24	GN	Miryang	Barley	F. graminearum	3ADON	A	2
SY71	P1-17-5-1-15	GN	Goseong	Barley	F. asiaticum	NIV	M	6
SY72	P1-17-4-4-39	JN	Yeongam	Barley	F. asiaticum	NIV	M	12
SY73	P1-17-5-2-48	GB	Yeongdeok	Barley	F. asiaticum	NIV	M	6
SY74	P1-16-3-4-21	GB	Daegu	Rice	F. asiaticum	NIV	M	9
SY75	P1-17-5-2-40	GB	Gyeonju	Barley	F. asiaticum	NIV	K	12
SY76	P1-17-5-2-13	GN	Miryang	Wheat	F. asiaticum	NIV	I	6
SY77	P1-17-4-4-15	JB	Gimje	Wheat	F. asiaticum	NIV	G	8
SY78	P1-17-1-4-25	GN	Hapcheon	Rice	F. asiaticum	3ADON	J	9
SY79	P1-16-3-2-56	JB	Iksan	Wheat	F. asiaticum	NIV	K	12
SY80	P1-17-5-1-37	GN	Jinju	Barley	F. graminearum	15ADON	A	2
SY81	P1-17-4-4-16	JB	Buan	Barley	F. asiaticum	NIV	M	8
SY82	P1-17-4-4-5	JB	Gimje	Barley	F. asiaticum	NIV	H	6
SY83	P1-17-4-2-15	JB	Gimje	Rice	F. graminearum	15ADON	A	2
SY84	P1-17-5-1-10	GN	Sancheon	Wheat	F. asiaticum	NIV	M	11
SY85	P1-17-4-4-66	JN	Haenam	Barley	F. asiaticum	NIV	J	8
SY86	P1-17-5-2-27	GN	Miryang	Barley	F. asiaticum	NIV	C	12
SY87	P1-17-5-2-29	GB	Daegu	Barley	F. graminearum	3ADON	A	2
SY88	P1-16-3-2-37	JB	Iksan	Barley	F. asiaticum	NIV	M	8
SY89	P1-17-4-4-10	JB	Gimje	Wheat	F. asiaticum	NIV	I	10
SY90	P1-17-5-2-22	GN	Miryang	Barley	F. asiaticum	3ADON	E	6
SY91	P1-17-4-2-27	JB	Buan	Rice	F. asiaticum	NIV	D	9
SY92	P1-16-3-2-42	JB	Iksan	Wheat	F. asiaticum	3ADON	M	6
SY93	P1-17-4-2-19	JB	Gimje	Rice	F. asiaticum	NIV	K	12
SY94	P1-17-5-1-51	GN	Jinju	Wheat	F. asiaticum	NIV	G	6
SY95	P1-17-1-4-80	JN	Yeongam	Rice	F. asiaticum	NIV	M	12
SY96	P1-17-1-4-47	GN	Hapcheon	Rice	F. graminearum	3ADON	A	2
SY97	P1-17-5-2-44	GB	Yeongdeok	Barley	F. asiaticum	NIV	M	6
SY98	P1-17-1-4-40	GN	Hapcheon	Rice	F. asiaticum	NIV	F	12	O
SY99	P1-17-4-4-49	JN	Haenam	Oat	F. asiaticum	NIV	M	6
SY101	P1-17-4-4-79	JN	Boseong	Barley	F. asiaticum	NIV	M	12
SY102	P1-17-4-2-16	JB	Gimje	Rice	F. asiaticum	NIV	I	12
SY103	P1-17-5-1-52	GN	Jinju	Wheat	F. asiaticum	3ADON	H	7
SY104	P1-17-1-4-14	GN	Hapcheon	Rice	F. asiaticum	NIV	I	9
SY105	P1-17-5-2-37	GB	Gyeonju	Barley	F. asiaticum	NIV	K	12
SY106	P1-17-2-3-16	JN	Yeongam	Rice	F. asiaticum	NIV	I	12
SY107	P1-16-3-4-42	GB	Gyeonju	Rice	F. asiaticum	NIV	M	12
SY108	P1-17-5-1-57	GN	Uiryeong	Wheat	F. asiaticum	NIV	M	11
SY109	P1-17-5-1-75	GN	Hapcheon	Wheat	F. graminearum	NIV	A	6
SY110	P1-16-3-4-61	GN	Uiryeong	Rice	F. asiaticum	NIV	K	6
SY111	P1-17-5-1-40	GN	Jinju	Barley	F. graminearum	3ADON	A	2
SY112	P1-16-3-4-24	GB	Daegu	Rice	F. asiaticum	NIV	B	6
SY113	P1-17-5-2-10	GN	Miryang	Barley	F. asiaticum	3ADON	C	8
SY114	P1-17-1-4-79	JN	Yeongam	Rice	F. asiaticum	NIV	M	11
SY115	P1-17-4-4-7	JB	Gimje	Wheat	F. asiaticum	NIV	D	2
SY116	P1-16-3-2-47	JB	Iksan	Barley	F. asiaticum	NIV	M	12
SY117	P1-16-3-2-66	JB	Gunsan	Barley	F. asiaticum	NIV	M	12
SY118	P1-17-5-2-30	GB	Daegu	Barley	F. asiaticum	NIV	K	8
SY119	P1-17-4-4-56	JN	Haenam	Wheat	F. asiaticum	3ADON	M	8
SY120	P1-17-5-2-47	GB	Yeongdeok	Barley	F. graminearum	15ADON	A	2
SY121	P1-17-4-4-52	JN	Haenam	Wheat	F. asiaticum	3ADON	E	8
SY122	P1-17-4-2-46	JB	Buan	Rice	F. graminearum	3ADON	A	2
SY123	P1-17-4-4-41	JN	Yeongam	Barley	F. asiaticum	NIV	K	2
SY124	P1-17-5-2-38	GB	Gyeonju	Barley	F. asiaticum	NIV	M	12
SY125	P1-17-4-4-23	JB	Buan	Barley	F. asiaticum	NIV	M	8
SY126	P1-17-4-4-33	JB	Buan	Barley	F. asiaticum	NIV	M	11
SY127	P1-17-4-4-55	JN	Haenam	Wheat	F. asiaticum	NIV	I	12
SY129	P1-17-4-4-62	JN	Haenam	Wheat	F. asiaticum	3ADON	M	11
SY130	P1-17-5-1-21	GN	Goseong	Barley	F. asiaticum	3ADON	E	6
SY131	P1-17-5-1-23	GN	Goseong	Barley	F. asiaticum	NIV	I	11
SY132	P1-17-1-4-41	GN	Hapcheon	Rice	F. asiaticum	NIV	I	11
SY133	P1-17-1-4-70	GN	Miryang	Rice	F. asiaticum	NIV	G	9
SY134	P1-17-5-2-50	GB	Yeongdeok	Barley	F. graminearum	3ADON	A	8
SY135	P1-17-4-4-27	JB	Buan	Wheat	F. asiaticum	NIV	M	11
SY136	P1-17-1-4-10	GN	Uiryeong	Rice	F. asiaticum	NIV	K	6
SY137	P1-17-5-2-20	GN	Miryang	Barley	F. asiaticum	NIV	I	11
SY138	P1-17-5-1-8	GN	Sancheon	Wheat	F. asiaticum	NIV	K	11
SY139	P1-16-3-2-48	JB	Jeonju	Barley	F. asiaticum	NIV	K	9
SY140	P1-17-5-1-36	GN	Jinju	Barley	F. asiaticum	NIV	M	8
SY141	P1-16-3-4-1	GN	Miryang	Rice	F. asiaticum	NIV	E	6
SY143	P1-17-5-2-14	GN	Miryang	Wheat	F. asiaticum	NIV	M	8
SY144	P1-16-3-4-41	GB	Gyeonju	Rice	F. asiaticum	NIV	D	6	O
SY145	P1-17-5-2-31	GB	Daegu	Barley	F. asiaticum	NIV	B	12
SY146	P1-17-4-4-77	JN	Gangjin	Barley	F. asiaticum	NIV	M	6
SY147	P1-17-4-4-20	JB	Buan	Barley	F. asiaticum	NIV	L	9	O
SY148	P1-17-4-4-9	JB	Gimje	Wheat	F. asiaticum	NIV	M	6
SY150	P1-16-3-2-43	JB	Iksan	Wheat	F. asiaticum	NIV	M	11
SY151	P1-17-1-4-67	GN	Miryang	Rice	F. asiaticum	NIV	K	6
SY152	P1-17-5-2-16	GN	Miryang	Wheat	F. asiaticum	NIV	I	11
SY153	P1-17-5-1-62	GN	Uiryeong	Barley	F. asiaticum	NIV	M	6
SY154	P1-17-1-4-26	GN	Hapcheon	Rice	F. asiaticum	NIV	M	8
SY155	P1-17-1-4-20	GN	Hapcheon	Rice	F. asiaticum	NIV	M	6
SY156	P1-17-5-1-1	JN	Boseong	Barley	F. asiaticum	NIV	M	6
SY157	P1-17-5-2-17	GN	Miryang	Wheat	F. asiaticum	NIV	M	11
SY158	P1-17-2-3-28	JN	Haenam	Rice	F. asiaticum	NIV	M	8
SY159	P1-17-5-1-50	GN	Jinju	Wheat	F. asiaticum	NIV	K	11
SY160	P1-17-4-4-73	JN	Gangjin	Barley	F. asiaticum	NIV	K	6
SY161	P1-17-5-2-5	GN	Hapcheon	Wheat	F. asiaticum	NIV	M	6
SY162	P1-17-2-3-68	JB	Iksan	Rice	F. asiaticum	3ADON	M	9
SY163	P1-17-5-1-74	GN	Hapcheon	Wheat	F. asiaticum	NIV	K	11
SY164	P1-17-5-1-63	GN	Uiryeong	Barley	F. asiaticum	NIV	M	6
SY165	P1-17-5-2-8	GN	Miryang	Barley	F. asiaticum	NIV	E	6
SY166	P1-16-3-4-74	GN	Uiryeong	Rice	F. asiaticum	NIV	H	6
SY167	P1-17-1-4-4	GN	Uiryeong	Rice	F. asiaticum	NIV	I	8
SY168	P1-17-5-1-53	GN	Uiryeong	Wheat	F. asiaticum	NIV	M	6
SY169	P1-17-5-1-60	GN	Uiryeong	Barley	F. asiaticum	NIV	M	3
SY170	P1-16-3-4-4	GN	Miryang	Rice	F. asiaticum	NIV	C	3
SY171	P1-17-4-4-2	JB	Gimje	Barley	F. asiaticum	NIV	M	11
SY172	P1-17-5-2-12	GN	Miryang	Barley	F. asiaticum	NIV	M	6
SY173	P1-17-1-4-75	JN	Yeongam	Rice	F. asiaticum	NIV	E	9
SY174	P1-17-4-4-4	JB	Gimje	Wheat	F. asiaticum	NIV	B	6
SY175	P1-16-3-4-47	GB	Gyeonju	Rice	F. graminearum	3ADON	A	2	O
SY176	P1-16-3-2-59	JB	Gunsan	Barley	F. asiaticum	3ADON	I	9
SY178	P1-16-3-4-22	GB	Daegu	Rice	F. asiaticum	NIV	K	6
SY179	P1-17-2-3-67	JB	Iksan	Rice	F. asiaticum	NIV	D	6
SY180	P1-17-2-3-62	JB	Iksan	Rice	F. asiaticum	NIV	M	11
SY182	P1-17-4-4-36	JB	Buan	Barley	F. asiaticum	NIV	M	6
SY183	P1-16-3-2-67	JB	Gunsan	Barley	F. asiaticum	NIV	M	6
SY184	P1-17-4-2-24	JB	Buan	Rice	F. asiaticum	NIV	M	11
SY185	P1-17-5-1-35	GN	Jinju	Barley	F. asiaticum	NIV	K	6
SY186	P1-16-3-4-48	GB	Gyeonju	Rice	F. asiaticum	3ADON	M	9
SY187	P1-16-3-2-38	JB	Iksan	Barley	F. asiaticum	NIV	M	6
SY188	P1-17-1-4-11	GN	Uiryeong	Rice	F. asiaticum	NIV	J	11
SY189	P1-17-4-2-35	JB	Buan	Rice	F. asiaticum	NIV	M	1
SY190	P1-17-1-4-53	GN	Miryang	Rice	F. asiaticum	NIV	L	9
SY191	P1-17-5-1-33	GN	Goseong	Wheat	F. asiaticum	NIV	K	11
SY192	P1-17-4-4-29	JB	Buan	Wheat	F. asiaticum	NIV	M	11
SY193	P1-16-3-4-78	GN	Uiryeong	Rice	F. asiaticum	NIV	B	8
SY194	P1-17-2-3-74	JB	Gunsan	Rice	F. asiaticum	NIV	I	5
SY195	P1-17-5-1-73	GN	Uiryeong	Wheat	F. asiaticum	NIV	F	6
SY196	P1-17-4-4-74	JN	Gangjin	Barley	F. asiaticum	NIV	M	6
SY197	P1-17-1-4-12	GN	Uiryeong	Rice	F. asiaticum	NIV	M	5
SY198	P1-17-5-2-28	GB	Daegu	Barley	F. asiaticum	3ADON	E	6
SY199	P1-17-5-2-36	GB	Gyeonju	Barley	F. asiaticum	NIV	I	11
SY200	P1-17-1-4-15	GN	Hapcheon	Rice	F. asiaticum	NIV	I	5
SY201	P1-17-4-4-26	JB	Buan	Wheat	F. asiaticum	NIV	M	6
SY202	P1-17-5-1-81	GN	Hapcheon	Wheat	F. asiaticum	NIV	M	11
SY203	P1-17-5-1-3	JN	Boseong	Wheat	F. asiaticum	NIV	M	10
SY204	P1-17-5-1-77	GN	Hapcheon	Wheat	F. graminearum	3ADON	A	7
SY205	P1-17-4-4-46	JN	Yeongam	Wheat	F. asiaticum	NIV	M	1	O
SY206	P1-16-3-2-57	JB	Iksan	Barley	F. asiaticum	NIV	M	2
SY207	P1-17-2-3-52	JB	Iksan	Rice	F. asiaticum	NIV	M	1
SY208	P1-17-2-3-59	JB	Iksan	Rice	F. asiaticum	NIV	I	5
SY209	P1-17-2-3-32	JN	Haenam	Rice	F. asiaticum	NIV	M	1
SY210	P1-16-3-2-76	JB	Gimje	Barley	F. asiaticum	NIV	I	7
SY211	P1-17-2-3-23	JN	Haenam	Rice	F. asiaticum	NIV	I	4
SY212	P1-17-5-1-42	GN	Jinju	Barley	F. asiaticum	NIV	M	6
SY213	P1-16-3-4-3	GN	Miryang	Rice	F. asiaticum	3ADON	J	6
SY214	P1-17-5-1-46	GN	Jinju	Wheat	F. asiaticum	NIV	M	7
SY215	P1-16-3-2-53	JB	Iksan	Wheat	F. asiaticum	NIV	M	5
SY216	P1-17-2-3-72	JB	Gunsan	Rice	F. asiaticum	NIV	M	4

## Sheet: Stress tolerance
Strain	H2O2	Sorbitol	NaCl	SDS	Fludioxinil	Iprodione	Tebuconazole	Tunicamycin	DTT	pH2	pH12
SY1	0.832037	0.297041	0.136965	-2.58785	-0.181925	0.0393968	-0.713145	-0.0167179	0.338757	0.834394	0.158419
SY2	-0.140226	0.0345815	-0.796871	-2.04688	-3.12228	-0.560531	-3.15015	-0.00409404	-0.679022	-2.26177	-1.04673
SY3	0.233934	0.497334	0.0951837	-2.34138	-0.00585048	-0.766927	-2.61868	0.163097	-0.641372	-0.209072	0.162807
SY4	-0.0825487	0.223117	-0.501743	-1.1948	-0.349796	0.0280368	-2.1826	0.251754	-2.62205	-0.626796	-0.63826
SY5	-0.202152	-0.627388	-1.57541	-0.47206	-0.528809	-1.64778	-0.30406	-0.964014	-0.793151	0.139952	-0.425423
SY6	-0.925597	-0.793234	-2.51766	0.263572	-1.29936	-1.16396	-0.295602	-0.756949	-1.09859	-1.76237	-0.831366
SY7	-0.099867	-0.651332	-1.52024	0.294116	-0.673735	-1.48538	-0.268794	-1.15249	-0.6276	-0.267208	-0.680271
SY8	0.0594222	-0.530158	-1.98979	-0.08705	-0.228064	-1.17533	-0.0156058	-0.609305	-0.442206	0.298135	-0.376793
SY9	-1.43872	-0.319305	-1.72475	0.957109	0.0311942	-1.51316	-0.218926	-0.437252	-1.93642	-1.43656	-0.172854
SY10	-0.277529	-0.312968	-0.121058	-2.5946	-0.858531	-0.591507	-3.20388	0.262447	0.182792	-0.261061	-0.0584005
SY11	0.273087	-0.386377	-1.4553	0.202033	-0.255102	-1.18322	0.401269	-1.10731	-0.31996	-0.00451025	-0.463231
SY12	-0.831564	-0.395038	-1.99323	0.43444	0.0819627	-1.46848	0.149987	-0.528553	-1.11176	-0.0427361	-0.588252
SY13	-0.225479	-0.0597143	-1.25702	1.14801	-0.166067	-0.880294	-0.0684073	-0.499028	-0.242404	0.18685	-0.155232
SY14	-0.0921275	0.104616	0.31449	-1.81395	-0.355565	-0.161024	-1.35429	0.396464	0.121013	-1.43421	-1.29139
SY15	-0.0320942	-0.0320068	-1.90968	0.521847	0.298474	-1.6462	-0.133678	-0.332557	0.208166	0.33691	-0.114743
SY16	-0.10189	-0.0226869	-0.111679	-2.42271	-0.329527	-0.321713	-3.08858	0.114363	-0.183721	-2.8847	0.0968073
SY17	-0.073382	-0.0670487	-0.887918	1.64107	0.138384	-0.454507	0.753642	0.138643	0.11915	-1.06425	0.356231
SY20	0.188196	-0.317286	-1.81389	1.10791	-0.360159	-1.18349	0.520996	-0.739802	-0.190851	0.462449	-0.17221
SY21	0.204646	-0.465988	-1.07258	-0.325853	-0.979241	-1.41104	0.206068	-0.973245	-0.135303	0.54498	0.0640862
SY22	0.209654	-0.168624	-1.25009	0.772053	-0.667295	-1.33999	-0.461029	-0.623111	-0.3704	0.196264	-0.0737298
SY24	0.0533203	0.109584	0.245399	-2.48812	0.142453	-0.584727	-0.448439	-0.0880803	-0.0588691	-0.0463976	0.214169
SY25	0.261706	-0.0707743	-1.18568	0.183821	-0.251147	-1.12663	-0.115918	-2.41281	-0.321277	0.187495	0.0170465
SY26	0.235664	-0.0312963	0.304215	2.08128	0.295085	-0.383603	-1.01159	-0.0573737	-0.707632	1.0752	0.178677
SY27	-0.540624	0.0657843	-1.10156	0.404443	0.0943132	-1.2067	0.0282453	-0.470331	-0.507272	-3.4014	0.00441108
SY28	0.437984	0.780552	0.82097	-0.923482	0.73065	0.243769	0.678131	0.204884	0.232685	1.24273	0.689848
SY29	-0.102484	0.0518743	-0.618396	-2.27339	0.052093	-0.441132	-1.80175	0.343945	-0.00376026	-1.73538	-0.0716041
SY30	-0.983741	-0.340151	-2.71467	-0.46771	-0.49164	-0.625381	-0.252688	-0.783806	-0.882714	0.032877	-0.257668
SY31	-0.133015	-0.183774	-1.60899	-0.380052	-0.530197	-1.07028	-0.465363	-0.866661	-0.39922	0.361173	-0.217753
SY32	0.460309	0.241915	0.347078	-2.42247	-0.906367	-0.609077	-2.22584	0.507241	0.439811	-0.0116959	-0.0899411
SY33	-0.00699342	-0.111745	-0.952154	1.88364	0.324652	-0.556075	-0.42535	-0.64805	-0.91139	0.235706	0.141393
SY34	0.122374	-0.144249	0.185061	-1.61536	0.26266	-0.0135361	-2.28123	-0.0782821	-0.865513	-0.636777	-1.04637
SY35	-0.207545	-0.021718	-3.62237	-1.33988	-0.642688	-0.968113	-2.44315	-1.05049	-0.361728	0.408015	-0.208967
SY36	-0.000620015	-0.488604	-2.0561	-0.9267	-0.948551	-1.54869	-0.235666	-1.7056	-0.768991	-0.202119	-0.0975385
SY37	-0.40797	-0.227215	-1.12426	1.46935	-0.103639	-0.653153	0.291346	-0.55429	-0.345355	0.2627	-0.0123231
SY38	-0.070829	-0.0211839	-1.43842	0.330401	-0.145385	-0.494141	0.0263019	-0.997243	0.0423842	0.17584	0.174532
SY40	-0.359947	-0.0373336	-1.57711	-0.0357063	-0.350508	-0.891184	0.455262	-1.41422	-0.439171	0.367922	-0.110049
SY41	-0.539711	-0.365448	-0.958155	0.349307	-0.154937	-0.976104	0.304179	-0.892357	-0.365252	-3.9389	-0.127255
SY42	-0.137116	-0.038888	-1.46771	-0.0287873	-0.0828825	-0.499619	0.422592	-0.697249	-0.262927	-0.823492	0.2636
SY43	-0.341936	-0.284975	-1.97778	0.21255	-0.603194	-0.460785	0.452395	-1.08595	-0.277483	0.11803	-0.0462204
SY44	-0.566201	-0.216502	0.0290611	2.14692	0.349885	-0.630141	-0.687167	-0.449778	-1.01187	0.443922	0.234831
SY45	0.130354	0.268178	0.18772	-3.05708	-0.472685	-0.759165	-1.39462	0.216961	0.298817	0.461476	-0.184653
SY46	-0.775418	0.125641	-0.379083	-1.96696	-0.576385	-0.256494	-0.254314	-0.1227	-1.1003	-2.84399	-1.8737
SY47	-0.994975	-0.351098	-0.102368	-2.24278	-0.184786	-1.87306	-2.19496	0.0189803	-0.850055	-2.69451	-0.973604
SY48	-0.146978	0.17417	-0.26008	-0.927707	-0.302668	0.120275	-1.41027	-0.118944	0.292186	-1.15689	-0.290794
SY49	-0.00771336	-0.0454514	-0.552546	1.04836	0.0840605	-0.340805	0.697997	-0.404959	-0.041908	0.497836	0.477687
SY50	-0.541071	-0.408665	-2.04757	0.542128	-0.256206	0.0751735	0.269765	-1.46029	-0.271898	-3.43771	0.130796
SY51	-0.0856116	-0.00910846	0.166865	-1.52289	-1.00748	-0.81992	-0.0608822	-0.438921	0.213755	0.656763	-0.0524752
SY52	-0.175803	0.548185	0.544385	-0.581568	-0.134316	-0.245655	-2.771	0.117261	0.562	1.08291	0.254914
SY53	-0.599151	-0.315836	-0.0657227	-2.56871	-0.473785	-0.497669	-0.780401	-0.23973	0.052126	0.70343	0.263315
SY54	-0.153044	0.016984	0.315494	2.14345	0.125048	-0.10606	-0.106714	-0.138167	-0.502719	0.972307	0.495987
SY55	-0.296334	0.0180013	0.350131	-0.0380722	0.2521	-0.421357	-3.2889	-0.367625	0.0131965	0.262439	0.187409
SY56	-0.730332	-0.240599	-0.0375376	0.398661	-0.0199272	-1.05208	-0.573868	-0.689316	-0.348579	0.238286	-0.306115
SY58	-0.451089	-0.284683	-0.0667359	0.340489	-0.418921	-0.863028	-0.740415	-0.558583	-0.25443	0.446805	-0.130434
SY59	-0.17118	-0.204205	-0.111065	-2.23122	-0.248365	-1.10821	-0.897083	-0.285227	-0.183983	0.416977	-0.10576
SY60	-0.254839	-0.114097	0.244915	2.02477	0.580177	-0.306208	-0.16466	-0.222136	-1.17738	0.650304	0.480232
SY61	-0.841352	-0.720652	-0.454719	-2.78778	-0.290898	-0.727258	-0.757654	-0.508368	-0.77056	0.228277	-0.428674
SY62	0.103428	-0.412599	-0.16086	-0.488125	-0.117658	-0.743334	-0.103951	-0.461209	-0.351375	0.587088	-0.111098
SY63	-0.468141	-0.0505211	-0.196097	-2.33507	-0.862036	-0.660116	-0.0460266	-0.186936	0.0509633	0.646429	0.0542193
SY64	-0.727292	0.0227787	0.315216	1.99531	0.594867	-0.254469	-1.18843	-0.0516377	-0.81063	0.856826	0.412986
SY65	-0.143799	0.0819653	0.121199	-1.88171	-0.0857167	-0.749236	-0.405853	0.0473425	0.160033	0.76742	0.381468
SY66	0.339679	0.41488	0.782234	2.81215	0.966487	-0.158726	0.615772	-0.205156	0.229914	1.20431	1.02378
SY67	-0.157313	0.227245	-1.08169	-1.34138	-0.00585048	-1.46849	-0.559791	0.44981	-2.93415	-1.50792	-0.151051
SY68	0.262207	-0.0254812	0.25805	-2.32453	-0.0998084	-1.64252	-1.67292	-0.0107869	0.481694	-3.58007	-0.750562
SY69	0.20804	-0.404451	0.135914	-2.62258	-1.84816	-1.36223	-0.585992	-0.291868	0.0969264	0.213745	-0.924012
SY70	-0.0396495	-0.287748	0.0249299	1.7249	0.0655366	-0.639242	-0.361207	-0.442525	-0.683611	0.701984	-0.24225
SY71	0.428182	0.317912	0.528328	-2.83214	-0.384368	-0.282109	0.0286907	0.0402552	0.751515	1.075	0.157831
SY72	-0.436309	-0.127761	-0.818351	-1.7244	0.130504	-0.873533	-1.0631	-0.137082	-1.49614	-3.22436	-0.744063
SY73	0.21377	-0.218584	0.168829	-2.38157	-1.19394	-2.06616	1.26781	-0.00656482	0.213148	-0.705698	-0.458349
SY74	-1.23188	-0.114708	-0.231715	-1.19281	-0.280888	-1.62194	-1.85868	0.557551	-3.23304	-2.55526	-1.42713
SY75	0.375642	-0.262681	-0.026828	-2.28128	-0.938641	-2.77095	-2.79514	0.292018	0.385082	-3.3807	-0.539366
SY76	0.5118	0.440531	-0.765348	-2.33014	-1.08843	-2.15685	0.14695	0.0623864	0.428371	-1.26857	-0.47866
SY77	0.285585	0.313019	0.310044	-2.69287	0.462685	-0.712741	-0.711038	0.164506	0.306429	-0.896124	-0.0891774
SY78	-2.66362	0.0484387	0.019608	-1.58404	-0.123383	-1.4016	-1.98687	0.587917	-3.86527	-1.86033	-0.0402012
SY79	-1.62334	0.14297	-0.15683	-1.14757	0.18702	-1.39251	-1.93742	0.0704544	-1.4939	-2.36482	-0.863325
SY80	0.113153	-0.122346	0.447617	2.03918	0.366239	-0.402991	-1.21648	-0.263636	-0.446587	0.716616	0.380209
SY81	0.357457	0.133924	0.393388	-2.63675	0.28695	-1.35283	0.0497676	-0.070621	0.264755	-0.398297	0.051954
SY82	-0.0129538	-0.0624402	0.449324	-1.8431	-0.140054	-0.350048	0.0616803	0.0272765	0.400706	0.850777	0.087264
SY83	0.0525449	0.00442719	0.477336	2.34752	0.59913	-0.495678	-0.197468	-0.0963557	-0.315772	0.982608	0.736352
SY84	0.59996	0.472897	0.809247	-1.98965	0.584562	-0.44409	0.51687	0.290772	0.765533	-2.18465	0.408088
SY85	0.151874	-0.535971	0.526346	-3.06153	-1.87578	-1.69322	-2.02696	0.177867	0.316093	1.21264	-0.118868
SY86	0.0711888	-0.424228	0.47459	-2.22732	0.0342109	-1.43689	-1.7919	-0.307804	0.0674336	-3.41694	-1.02554
SY87	0.295223	0.326803	0.81763	1.97332	0.78713	0.115053	0.00686815	0.164624	-0.00175025	1.29377	0.951807
SY88	-0.805212	0.252173	-0.00743795	-2.18028	-0.115614	-0.851597	0.0940234	0.351442	-0.916725	0.312761	-0.256504
SY89	0.295221	-0.204341	0.47016	-2.29694	-3.16375	-1.08441	-1.78224	0.394583	-0.398571	-2.94179	-0.392041
SY90	0.274106	0.316074	0.260969	-2.76748	0.0434256	-0.624333	0.457424	0.257642	0.651722	1.41336	-0.0761702
SY91	-0.881489	0.149079	-1.11053	-0.238976	-1.10989	-0.448542	-1.4008	-0.0666928	-1.88066	-1.45205	-0.552582
SY92	0.189781	0.175034	0.669269	-2.73314	0.146895	-0.868283	-0.423256	0.199278	0.521862	0.874031	0.21934
SY93	-0.849016	0.0672553	-0.591626	-1.61031	-0.29339	-1.46822	-2.34435	0.223272	-0.141523	-2.3227	-0.897817
SY94	0.542892	0.445081	0.649417	-1.18357	0.0581394	-0.15467	0.976122	0.572402	-0.274785	-0.161361	-0.403813
SY95	0.155336	0.0965676	-0.283898	-2.70653	-1.54092	-2.04513	-1.88697	-0.215753	0.240897	-4.09545	-0.300385
SY96	-0.0726955	-0.277443	0.11794	1.58346	0.0879893	-0.667802	-0.447705	-0.474768	-0.456767	0.661212	-0.147502
SY97	0.358662	0.136696	0.532139	-2.45598	-0.84128	-0.178819	0.459679	0.0898072	0.662222	1.54514	0.524718
SY98	0.205256	-0.0373336	0.281245	-1.41681	-1.1877	-0.98411	-2.10205	0.17308	0.607609	-2.72268	0.190565
SY99	0.107816	-0.168617	0.249667	-3.12911	-0.745629	-0.953113	0.0762065	-0.0931354	0.225834	-2.03214	0.00169117
SY101	-0.0472759	0.069143	0.960415	-1.81005	-1.73435	-1.43466	-1.7681	-0.207251	0.0961365	-2.10212	-0.354852
SY102	-0.551484	-0.247398	-0.163916	-2.34554	0.451893	-1.45426	0.362834	0.0852056	-0.693888	-3.44495	-0.348165
SY103	0.212634	-0.251531	0.188623	-1.01201	-0.0642264	-0.506042	-0.494912	-0.527893	0.194622	0.724669	0.0113221
SY104	-1.1489	0.00758481	0.176132	-1.77431	-0.613222	0.3716	-1.19225	0.0462841	-0.792176	-2.08366	-0.699489
SY105	0.434023	0.00660971	0.0853213	-1.67095	-1.00327	-1.75853	-3.45711	-0.0120161	0.502165	-3.18541	-0.357558
SY106	0.0329186	-0.27972	-0.193283	-2.64434	-0.703157	-3.14436	-0.48239	-0.460087	-0.0523037	-2.26695	-1.03302
SY107	0.701254	0.431621	0.572055	-1.90891	-2.49032	-3.29905	-0.852307	0.470042	0.207369	-3.32027	-1.26875
SY108	0.798967	0.135909	0.0936701	-1.96696	0.121254	-1.06572	-0.125484	0.353827	0.543009	-2.96684	-0.434316
SY109	0.576748	0.117297	0.43366	-1.61506	-0.414394	-0.404804	0.38253	0.169989	0.560441	1.18412	-0.223923
SY110	0.0977235	0.283368	0.530594	-0.31538	0.373948	0.422546	-0.43203	0.172906	0.451745	1.42012	-0.00577581
SY111	0.468536	0.211034	0.619936	1.63002	0.759284	0.171864	0.00131023	0.151782	0.209191	1.40634	0.427737
SY112	0.0373607	0.156753	0.114998	-1.82132	0.0604144	-0.229284	0.0144222	0.0466691	0.147913	-0.650339	-0.439741
SY113	0.682107	0.0740989	0.318414	-2.369	0.0300377	-0.282323	-0.290704	-0.0830221	0.248984	-0.183015	-0.175078
SY114	0.124028	0.0193116	-0.140764	-1.83882	0.523182	-1.05975	-2.52405	0.326574	0.317345	-2.49936	-1.02857
SY115	0.473383	0.320077	0.602145	-2.51503	-0.130995	-0.87225	0.400365	0.257551	0.973123	1.06449	0.623886
SY116	-0.320679	-0.115731	-0.339	-1.51318	-0.297536	-0.984788	-0.0727426	0.193339	-0.283325	-2.6126	-0.660333
SY117	-0.153792	-0.0221205	-1.29767	-0.756266	-1.25152	-2.73137	-1.67367	-1.00591	-0.417984	-2.00769	-1.33389
SY118	0.241362	-0.197887	0.275499	-2.13848	-1.01225	-0.69716	-2.27213	0.141941	0.555476	-0.0845127	-0.0865616
SY119	-0.0366591	-0.261959	0.24441	-3.06385	0.672221	-0.323057	-1.45471	-0.115713	-0.00815424	0.642368	-0.419845
SY120	-0.00915865	0.16093	0.637532	1.71849	0.58023	0.094106	-0.138424	0.100213	-0.133294	0.831042	0.400201
SY121	0.425696	0.0591883	-0.339674	-1.85716	-0.898698	0.0823027	-2.0376	-0.113143	0.410038	1.20531	-0.517875
SY122	0.0357444	-0.144212	0.267308	2.2687	0.474908	0.0989486	-0.542856	-0.0848323	-0.251606	0.981891	-0.0690634
SY123	0.393542	0.891932	0.912216	2.89403	0.808264	0.769435	1.15386	0.093267	0.408266	1.52647	1.34732
SY124	0.213117	-0.104762	0.315055	-2.57082	-0.567269	-1.57909	-2.08731	0.0514966	0.544229	-3.16004	-0.140143
SY125	0.091158	-0.198811	0.419824	-2.41574	-0.155332	-0.233796	-0.483876	0.0305101	0.421776	0.537953	-0.422822
SY126	0.0423202	-0.219072	0.0274784	-2.41601	-0.942972	-0.197337	-1.2473	0.0839171	0.686721	-3.64096	-0.319935
SY127	-0.0736706	-0.33279	-1.00744	-1.27339	-2.48485	-1.35318	-1.72513	-0.0430337	-2.9351	-2.3255	-1.5077
SY129	0.613214	0.0573032	0.688132	-1.81618	0.256319	-0.708454	-2.21901	0.347491	0.342371	-1.51705	-0.603037
SY130	0.49155	0.314139	0.63949	-2.87244	0.273266	-0.0134805	-0.3561	-0.219737	0.667665	1.14469	-0.0570288
SY131	0.19602	0.570099	0.0880958	-0.969959	0.87372	1.0318	-1.89362	0.269438	-0.61164	-1.68751	-1.34178
SY132	-0.242349	-0.288216	0.0662814	-1.45121	-0.593505	0.112852	-1.02961	0.171896	-0.234047	-2.02706	-1.32177
SY133	-0.388982	-0.198998	-0.584955	-2.20372	-0.304763	0.399563	-0.471043	-0.110876	-1.32835	-2.51465	-0.26726
SY134	0.27571	0.371081	0.440932	-1.56198	0.0675591	0.327103	-3.50538	0.199016	0.555136	1.24649	0.0186136
SY135	0.8619	0.393036	1.4932	-1.21894	-0.876299	0.676051	-1.7328	0.793049	1.28515	-2.42939	-0.721959
SY136	0.00491937	0.0584737	0.146897	-2.54509	-0.510173	0.0903085	-0.415425	-0.0282369	0.601681	1.24742	0.209948
SY137	0.0511693	-0.288498	0.13639	-1.86652	-0.563413	0.355521	0.257189	-0.271251	0.326638	-3.32851	-0.181878
SY138	0.344093	-0.107621	-0.209748	-2.80903	-1.04649	0.0621955	-0.50527	-0.00993624	0.426865	-2.77459	-0.321309
SY139	-0.85029	0.0382966	0.143955	-1.40075	-0.00614385	0.666456	-1.94798	0.41787	-2.5479	-2.28763	-0.744163
SY140	0.133016	0.2046	0.587423	-1.76109	0.0688831	0.742442	-1.42695	0.274776	0.317078	0.734963	-0.256654
SY141	-0.117218	0.143351	0.00165398	-1.79725	-0.0860499	0.224876	0.902537	0.452518	0.196795	0.0419346	-0.115562
SY143	0.207559	0.0159084	0.270871	-1.44825	0.0836798	-0.0852835	-2.24622	0.240296	0.468622	1.0829	0.205818
SY144	0.276231	-0.284438	0.0634272	-2.82329	-1.24716	-0.385613	-0.241233	-0.0708265	0.329592	-0.99988	-0.410364
SY145	-0.334693	-0.387831	-1.54791	-1.60596	-3.06184	-1.0863	-0.258772	-0.955631	-0.476266	-3.10592	-0.809744
SY146	0.12379	-0.0520364	-1.66142	-2.23549	-0.567806	-0.14364	-0.110584	-0.183594	0.419161	-1.64189	-0.081536
SY147	-0.338673	0.178443	-0.0311013	-2.06796	-1.26235	-0.0581705	-1.26568	0.121748	-3.44523	-3.12785	-0.486865
SY148	0.437375	0.24116	0.559387	-2.70942	0.353024	0.683548	0.00784088	0.171427	0.75285	0.862013	0.0438328
SY150	-0.291928	-0.144137	0.161451	-2.30713	-0.449426	-0.340495	-0.0661024	-0.0677288	-0.124963	-3.82158	-1.07944
SY151	-0.108577	-0.0949924	0.308521	-2.29016	-0.0255247	0.248361	0.34756	-0.101475	0.298198	-0.896041	0.144351
SY152	0.533399	0.400552	-0.122093	-2.12501	-1.04931	-0.127415	0.535856	0.243674	0.709233	-2.66643	-0.435559
SY153	0.544805	0.183056	0.138458	-2.27211	0.0309979	0.63053	0.0464791	0.162744	0.778148	0.15203	0.215301
SY154	0.0627553	-0.049625	0.201088	-1.90776	0.276364	-0.538032	-1.26329	0.325614	-0.15444	1.47968	-0.281562
SY155	-0.165715	-0.0868606	0.367608	-2.74017	0.0760056	0.309555	0.25439	-0.00359117	0.299969	0.957227	0.0360769
SY156	0.197891	0.156048	0.291195	-1.4842	-0.0283195	0.112297	0.438982	-0.39638	0.300359	-1.52841	-0.191898
SY157	0.970278	0.576875	0.202061	-2.52599	0.144689	0.62347	-0.613784	0.216662	0.753127	-3.08699	0.349092
SY158	-0.0853435	0.286617	0.491306	-1.79941	0.427974	0.630243	-0.669208	0.078588	0.348387	0.991942	0.0211493
SY159	0.308499	-0.121285	-0.933437	-1.47692	-0.567151	0.470523	-2.06616	-0.245742	0.0234195	-1.78784	0.129886
SY160	0.472255	0.0282547	0.413416	-1.76034	-0.293729	0.589946	0.989553	0.265655	0.6027	0.585616	0.306071
SY161	0.607356	0.656341	0.946743	-1.63287	0.626302	0.976034	1.261	0.20585	0.862958	1.55952	0.724553
SY162	-1.6881	-0.28769	-0.447765	-2.33364	-1.09764	0.116914	-0.641314	0.049953	-2.10538	-3.43306	-1.83873
SY163	0.555698	0.513657	0.20674	-2.21121	-0.0836713	0.784848	0.586719	0.221301	0.814649	-2.92597	0.509581
SY164	0.46866	0.324323	0.221733	-1.97383	0.0908367	1.20589	0.477171	0.166438	0.834568	0.643289	0.542022
SY165	0.36249	0.339329	0.824879	-2.27757	0.712865	1.01301	0.0942547	0.14115	0.873186	1.44344	0.633987
SY166	0.24848	0.327527	0.543419	-1.41767	0.931579	0.918728	-0.222777	0.219526	0.663112	1.5032	0.406223
SY167	0.197791	0.318407	0.627817	-2.73767	0.233147	0.843866	-1.51601	0.0200557	0.665047	1.43074	-0.220243
SY168	0.726988	0.0600745	0.308464	-2.07692	0.297654	0.828175	0.857127	0.34983	0.680513	0.598449	0.21785
SY169	0.897936	0.530748	0.972709	1.80239	1.26333	0.66692	1.20969	0.169399	1.08242	-1.57516	0.673513
SY170	0.0988563	0.265707	0.0181687	1.1342	0.777798	0.678228	0.772294	0.14947	0.470881	-3.71493	0.353471
SY171	0.0484505	-0.275788	-0.419375	-2.37393	-0.328311	0.311599	-1.72231	0.170656	0.50379	-1.16629	-0.108433
SY172	0.32735	0.2074	0.439155	-2.70282	-0.102031	0.431994	-0.374713	0.230061	0.710904	1.10064	-0.11571
SY173	-0.792747	-0.352445	-0.87509	-1.65561	0.347939	0.164817	-0.880906	0.0802116	-3.11088	-1.95752	-0.734898
SY174	0.469796	0.664541	0.914988	-2.20567	0.981252	0.686188	0.838388	0.347047	0.877487	1.25194	0.692184
SY175	0.0598128	-0.0590287	0.340705	2.16316	0.462685	0.368839	0.140947	-0.148793	-0.0949963	0.761514	0.254848
SY176	-1.00736	-0.164488	-0.124626	-2.02914	-0.43778	0.714862	0.848684	0.189302	-2.96245	-0.734477	-0.856599
SY178	0.435244	0.560062	0.710089	-2.41028	0.00657112	0.665554	0.74403	0.135177	0.67361	1.0715	0.40108
SY179	0.0966219	0.141275	-0.428444	-1.60263	-0.863419	0.508733	1.01211	0.167691	0.133864	-1.71626	0.42067
SY180	0.0621708	0.206442	-0.507569	-2.08779	-0.562288	0.683659	-1.36287	-0.0467756	0.294511	-2.8977	-0.0134425
SY182	0.267508	0.280242	0.512087	-2.26209	-0.288046	0.967737	0.586993	0.0467897	0.796264	1.17301	0.0183865
SY183	0.0175231	0.169003	0.456386	-1.64606	0.0664391	0.767714	0.500568	0.553336	0.184072	-1.05432	0.209577
SY184	-1.30514	0.333245	-0.757568	-1.25269	-0.792035	0.831993	-2.29707	0.608199	-0.671428	-2.14566	-0.595427
SY185	0.293806	0.244905	0.454668	-2.20759	-0.00294202	0.561469	-0.0938474	0.363719	0.474039	1.33578	0.349191
SY186	-0.651385	-0.226879	0.154616	-2.4894	-1.32831	0.279657	-0.644308	0.195699	-1.05931	-2.73638	-1.29286
SY187	-0.0583111	0.453859	0.493392	-1.59294	-0.787326	0.572195	-0.458336	0.154255	-0.15204	1.5817	0.306064
SY188	-0.0375199	0.0249676	0.38073	-2.46312	-0.622041	0.297637	-2.36999	-0.00231809	0.0630006	-4.09305	-0.52244
SY189	-3.64524	-2.20361	-3.51569	1.43624	1.34972	1.02637	2.11331	0.29339	-4.22096	-4.61136	0.477407
SY190	-1.00736	0.28427	0.311473	-2.40765	0.733407	0.60639	0.396372	0.264709	-3.96245	-2.43668	-1.057
SY191	0.156028	-0.0293629	0.0515699	-2.42939	0.735841	0.900505	0.259946	0.176329	0.324795	-3.20688	-0.344612
SY192	0.580183	0.12289	-0.949722	-1.06282	-1.22919	1.14971	-1.82822	0.584082	0.835551	-2.16224	0.405478
SY193	0.255013	0.115813	0.349401	-2.74232	0.236355	0.552275	-0.44883	0.0719848	0.290698	-0.325165	-0.803574
SY194	0.493248	0.48824	-0.270472	-1.42539	-0.677493	1.30241	0.693015	0.83884	-2.72865	-2.3255	1.11908
SY195	0.31649	0.0670361	0.277604	-2.74803	0.0504926	0.73046	0.0426179	0.125574	0.549611	0.487776	-0.0623149
SY196	0.324882	-0.227517	-0.263265	-2.76758	-0.923896	0.0832933	0.21565	0.115678	0.584512	0.88465	0.17743
SY197	-1.00492	0.87984	1.09828	-0.627797	-1.10229	1.72543	-0.00415731	0.43036	-2.25299	-1.62412	0.573985
SY198	0.529783	0.00958741	0.422887	-2.9899	0.151152	0.699479	-0.328082	0.226775	0.769473	0.757004	0.298604
SY199	0.529295	-0.0927034	0.2248	-2.75212	-1.61612	0.312796	-0.70649	0.0186607	0.279115	-2.55386	0.142848
SY200	-0.755198	0.50285	-0.0264589	-0.559052	-1.54967	1.37981	2.1211	0.432417	-0.717927	-2.63338	-0.134407
SY201	0.279451	-0.556857	-0.167593	-2.94811	-1.39708	0.115923	0.345789	-0.0940072	0.572371	-1.33237	0.11381
SY202	0.271868	-0.102459	-0.0499899	-1.97594	-1.88433	0.515525	-2.37877	0.084795	0.40704	-3.26177	-0.293629
SY203	-0.77846	0.214089	0.488951	-1.5745	-3.13389	1.80372	-2.24037	-0.41863	0.253163	-2.72283	0.245312
SY204	-0.231638	-0.608318	-0.245973	-0.160349	0.485577	0.00205273	0.793392	-0.120052	-0.595717	0.255931	0.611948
SY205	-2.437	-2.31405	-3.81808	1.74945	1.47015	1.12972	2.19975	0.418623	-2.92142	-4.54048	0.576091
SY206	0.357342	-0.449535	-1.39487	1.88473	1.34792	0.942376	2.0948	0.320791	1.04837	-0.091308	1.06296
SY207	-2.22338	-1.96671	-2.6971	1.60598	1.36324	1.03153	2.06455	0.335767	-3.36257	-4.97758	1.00737
SY208	-1.2621	-0.787355	-2.40115	-0.930445	0.871092	0.588326	1.71928	0.0978386	-0.875097	-3.01023	0.524456
SY209	-3.24393	-3.91686	-3.49197	1.64875	1.49496	1.12675	2.15841	0.493597	-5.17522	-4.52392	-0.363534
SY210	-0.846824	-0.934371	-0.593252	-1.75778	0.698098	0.621819	1.35536	0.061451	-0.581113	-0.641403	0.581987
SY211	-1.70198	-1.89487	-1.21958	1.8219	1.33873	1.03389	2.05289	0.27502	-3.05627	-0.727729	1.02967
SY212	0.00150493	0.000634211	0.309649	-0.975941	-0.0842293	0.502814	0.0766778	-0.220605	0.44921	0.735114	0.556486
SY213	-0.0182142	-0.112873	-0.175924	-2.314	0.406967	0.825685	-0.107035	0.0598267	0.443435	-1.49853	-0.0118956
SY214	-0.666261	-1.18883	-0.897344	0.155025	0.692411	0.541987	1.35809	0.00571876	-0.443833	0.306993	0.276712
SY215	-1.20832	-0.75213	-0.807508	-0.155069	1.1074	0.676268	1.19024	-0.0699032	-1.69847	-3.18156	-0.084532
SY216	-1.92369	-1.24828	-1.28806	1.614	1.28242	0.889893	1.9373	0.329479	-1.19042	-0.658724	0.716492
Z-3639_1	-0.123975	-0.115491	-0.768306	2.13529	0.334963	-0.0307838	0.0987694	-0.453614	-0.642792	0.593967	0.20202
Z-3639_2	0.0562814	0.093063	0.175091	2.15247	0.330047	-0.747673	-0.732235	-0.296934	-1.05769	0.659226	0.432471
Z-3639_3	-0.146896	-0.0626643	0.40164	2.16666	0.642301	-0.386801	-0.130369	-0.187192	-0.429878	0.615772	0.277895
Z-3639_4	-0.0110217	0.354962	0.576394	2.45947	1.03433	0.700835	0.243364	-0.00841065	-0.0176945	0.947843	0.395872
Z-3639_5	0.0791234	0.0795866	0.514312	2.3075	0.792101	0.572672	0.233922	0.256218	-0.232053	0.949561	0.70322
